# Supplementary material
Source: PubMed Central journal article supplement (PMC10783441)
Supplement: TablesS1-S5andFigsS1-S10_PEDS23-155.pdf [file TablesS1-S5andFigsS1-S10_PEDS23-155.pdf]

**ONLINE ONLY**

## **Supplemental material**

### **Concurrent impact of de novo mutations on cranial and cortical development in nonsyndromic craniosynostosis**

Kiziltug et al.

<https://thejns.org/doi/abs/10.3171/2023.8.PEDS23155>

**DISCLAIMER** The *Journal of Neurosurgery* acknowledges that the following section is published verbatim as submitted by the authors and did not go through either the *Journal's* peer-review or editing process.

Table S1: Nonsyndromic CS disorder risk genes

ABCC1  
ARHGEF18  
DVL3  
KIAA0100  
KMT5B  
TMEFF1  
NAA25  
NKX6-1  
NME5  
PCNT  
SMAD6  
SPRY1  
TCF12  
THRA  
ZCCHC11  
ACBD5  
CPED1  
DCAF13  
GPRC5A  
KIAA1211  
MESP1  
MRPS14  
SMARCD2  
SPRY4  
ZNF622  
ARAP3  
DUS3L  
FBXO27  
KIAA1841  
KPNA2  
KRI1  
MACF1  
MADD  
SLC25A21  
SLC35E2B  
TTC12  
VPS13C  
ABCC5  
ACADM  
AGAP3  
ASB5  
AXIN1  
CACNA1H  
CATSPER4

CCBL2  
COL11A1  
CSF2RB  
EDEM1  
EFNA5  
EXTL3  
GAK  
H2AFV  
HELZ2  
HERC2  
IVD  
KCNH1  
KCNH3  
KCNN4  
MAPK7  
MARCO  
MEMO1  
MTHFD1  
NPHP4  
PEPD  
PSD2  
PSMC2  
PSMC5  
RASAL2  
RCCD1  
SETX  
SI  
SLC12A2  
SLC12A6  
SLC2A14  
SLC4A3  
SLC5A2  
SMURF1  
TBCB  
TENM2  
THBS1  
TSC1  
ZNF778  
ATAD5  
CAPN1  
ZC3H7A  
ZNF469

Table S2: Autism risk genes

ADNP  
AKAP9  
ANK2  
ARID1B  
ASH1L  
BCL11A  
BTRC  
C16orf13  
CACNA2D3  
CCSER1  
CHD2  
CHD8  
CMPK2  
CTTNBP2  
CUL3  
DDX3X  
DNMT3A  
DSCAM  
DYRK1A  
ERBIN  
ETFB  
FAM98C  
FOXP1  
GABRB3  
GIGYF1  
GRIN2B  
ILF2  
INTS6  
KATNAL2  
KDM5B  
KDM6B  
KMT2C  
KMT2E  
KMT5B  
MFRP  
MLANA  
MYT1L  
NCKAP1  
NRXN1  
P2RX5  
PHF2  
POGZ  
PRKAR1B  
PTEN

RANBP17  
RAPGEF4  
SCN2A  
SETD5  
SHANK2  
SHANK3  
SMURF1  
SPAST  
SYNGAP1  
TBR1  
TCF7L2  
TMEM39B  
TNRC6B  
TRIP12  
TSPAN4  
USP45  
WAC  
WDFY3  
CAPN12  
GRIA1  
MYO5A  
PCM1  
SLC6A1  
UIMC1  
ZNF559  
ADNP  
MED13L  
ANKRD11  
TLK2  
DEAF1  
CTNNB1  
KCNQ3  
SRPRA  
TBL1XR1  
RORB  
RAI1  
DYNC1H1  
DPYSL2  
AP2S1  
PAX5  
MKX  
SIN3A  
MBD5  
MAP1A  
STXBP1  
CELF4

PHF12  
PPP2R5D  
TM9SF4  
PHF21A  
PRR12  
SKI  
ASXL3  
SMARCC2  
CREBBP  
TCF4  
CACNA1E  
GNAI1  
TCF20  
FOXP2  
NSD1  
LDB1  
EIF3G  
KIAA0232  
VEZF1  
GFAP  
IRF2BPL  
ZMYND8  
SATB1  
RFX3  
SCN1A  
PPP5C  
TRIM23  
TRAF7  
ELAVL3  
GRIA2  
LRRC4C  
NUP155  
NR3C2  
NACC1  
PTK7  
PPP1R9B  
GABRB2  
HDLBP  
TAOK1  
UBR1  
TEK  
KCNMA1  
CORO1A  
HECTD4  
NCOA1  
DIP2A

Table S3: Developmental disorder risk genes

ARID1B  
ANKRD11  
DDX3X  
ADNP  
KMT2A  
SYNGAP1  
SCN2A  
DYRK1A  
SETD5  
MECP2  
ASXL3  
STXBP1  
KCNQ2  
PPP2R5D  
MED13L  
CTNNB1  
SATB2  
WDR45  
TCF4  
EP300  
FOXP1  
CDK13  
SMC1A  
PURA  
TBL1XR1  
GATAD2B  
HDAC8  
PACS1  
SLC6A1  
AHDC1  
GNAO1  
HNRNPU  
KANSL1  
CSNK2A1  
KAT6B  
GRIN2B  
CHD2  
ALG13  
KAT6A  
CDKL5  
POGZ  
MEF2C  
EHMT1  
GNAI1  
CASK

IQSEC2  
SMAD4  
CTCF  
CREBBP  
SMARCA2  
NAA10  
CHAMP1  
PPM1D  
NSD1  
COL4A3BP  
DNM1  
CNKSR2  
CNOT3  
KIF1A  
SCN1A  
MSL3  
KCNH1  
KCNQ3  
BCL11A  
EEF1A2  
WAC  
PTEN  
ZBTB18  
PDHA1  
NFIX  
CHD8  
GABRB3  
USP9X  
DYNC1H1  
SUV420H1  
FOXG1  
TCF20  
SCN8A  
PUF60  
ZC4H2  
MYT1L  
CHD4  
TRIO  
ITPR1  
BRAF  
PPP2R1A  
PTPN11  
SET  
AUTS2  
SLC35A2  
KDM5B



ASXL1  
UPF3B  
PHF21A  
PRR12  
SKI  
ASXL3  
SMARCC2  
CREBBP  
TCF4  
CACNA1E  
GNAI1  
TCF20  
FOXP2  
NSD1  
LDB1  
EIF3G  
KIAA0232  
VEZF1  
GFAP  
IRF2BPL  
ZMYND8  
SATB1  
RFX3  
SCN1A  
PPP5C  
TRIM23  
TRAF7  
ELAVL3  
GRIA2  
LRRC4C  
NUP155  
NR3C2  
NACC1  
PTK7  
PPP1R9B  
GABRB2  
HDLBP  
TAOK1  
UBR1  
TEK  
KCNMA1  
CORO1A  
HECTD4  
NCOA1  
DIP2A

Table S4: Schizophrenia risk genes

AKT1  
MAGI2  
CHRNA7  
GRIN2B  
HTR2A  
NOS1  
RELN  
SRR  
CSMD1  
TCF4  
SHANK3  
NRXN1  
RTN4R  
SP4  
SETD1A  
PPP3R1  
SYNGAP1  
MDK  
NRG3  
CNR1  
DISC1  
GRM5  
GSK3B  
ZDHHC8  
APOE  
NR4A2  
SLC6A3  
DTNBP1  
PPP1R1B  
KMO  
CPLX2  
BACE1  
MBP  
TAAR1  
MAP6  
PTGS2  
PLCB1  
LRRTM1  
MAP2K7  
NLGN2  
SLC6A1  
YWHAH  
MTOR  
AVPR1A

ZIC2  
GNAS  
BECN1  
CHI3L1  
COMT  
DRD3  
BRD1  
DAOA  
DISC2  
ANK3  
GRIA1  
GRM3  
NRG1  
HLA-DRB1  
MTHFR  
NCAM1  
NOTCH4  
NRGN  
PDE4B  
ABCB1  
PRODH  
SLC1A1  
TBX1  
CACNA1C  
ZNF804A  
FOXP2  
FEZ1  
NOS1AP  
SRGAP3  
SYN2  
MED12  
CHRNA5  
HLA-DQB1  
VRK2  
HLA-A  
NDE1  
DLG2  
GABBR1  
MIR137HG  
ARVCF  
TCF7L2  
FYN  
CNNM2  
YWHAE  
TSPAN18  
TSNARE1

MPC2  
ITIH3  
NTRK3  
PBRM1  
MAD1L1  
DCC  
ESR2  
NKAPL  
HLA-B  
MSRA  
ATP2A2  
OPCML  
BCL9  
TNXB  
UFD1  
DDR1  
CACNB2  
PGBD1  
RAI1  
CHRNA3  
ABCA13  
FGFR1  
NLGN1  
TNIK  
TENM4  
GPM6A  
ITIH1  
ZKSCAN4  
PDE4D  
BCL11A  
PPP2R2B  
AMBRA1  
CACNA1B  
ALDH1A2  
DOCK4  
SDCCAG8  
LRRK2  
CTNNA2  
EML5  
DPYD  
RTKN2  
PSD3  
TMEM245  
APOL2  
GJA5  
GJA8

PCDH17  
HFE  
HHAT  
CYP26B1  
ADAMTSL3  
ZSCAN31  
SOX5  
MEGF10  
SLC25A12  
CEACAM21  
PLAA  
CDC25C  
OLIG2  
KLF12  
CHRM1  
CHRNA4  
ADCYAP1  
TPH2  
CNP  
CRP  
ADRA1A  
CYP1A2  
CYP2D6  
DAO  
ACE  
DLG4  
DNMT1  
DRD1  
DRD2  
DRD4  
EGF  
EGR3  
MARK2  
C9orf72  
ERBB4  
ESR1  
F2  
FHIT  
PLCL2  
FMR1  
ANKK1  
GABRB2  
GAD1  
CNTNAP2  
GDNF  
GLUL

DAOA-AS1  
GRIN2A  
NR3C1  
GRM2  
GRM7  
HTR1A  
HTR2C  
HTR6  
IFNG  
IL1A  
IL1B  
IL2  
IL4  
IL6  
IL10  
KCNN3  
LEP  
MIR137  
MAG  
MAOA  
MAOB  
MMP9  
NPY  
NTF3  
PIP4K2A  
PLA2G1B  
PLA2G4A  
AHI1  
PPP3CC  
VPS35  
PRL  
PSD  
SLC17A7  
RTN4  
PVALB  
BDNF  
S100B  
CCL2  
NPAS3  
SLC1A2  
SLC6A4  
SLC6A9  
SLC18A2  
SOD2  
SST  
TNF

TPH1  
FZD3  
APOL4  
ST8SIA2  
NDEL1  
SYN3  
PLA2G6  
CCK  
CHRFAM7A  
HOMER1  
CNTF  
DLG1  
ERBB3  
MLC1  
GFAP  
HPGDS  
GNAO1  
GSTM1  
NDUFV2  
OXTR  
ACTB  
CLDN5  
TP53  
VIPR2  
CCKAR  
PDLIM5  
CYFIP1  
GAD2  
GSTT1  
HLA-C  
HSPA1A  
HTR3A  
IL3  
NTRK2  
PCM1  
PIK3CA  
AVP  
SOX10  
TLR4  
TSNAX  
VEGFA  
ADORA2A  
CREB1  
CMYA5  
NTNG1  
ARC

GABRB3  
GRIK3  
ERVW-1  
HINT1  
HTR1F  
HTR7  
KCNH2  
MAP2  
MOG  
NTS  
PAH  
PIK3CB  
PLXNA2  
SLC12A5  
SLC1A3  
SLC12A2  
SLC18A1  
SYP  
CALM1  
QKI  
CLOCK  
SIGMAR1  
CAMKK2  
CHL1  
CHRM4  
CTNNB1  
DLG3  
EGR1  
FABP7  
ADNP  
GRIA2  
GRID1  
GRIK1  
GRM1  
GRM8  
GSTP1  
HDAC1  
HDAC2  
HSPA1B  
HTR5A  
IL18  
NTRK1  
OPRM1  
PCNT  
BAG1  
NUFIP2



SOD1  
SREBF1  
VGF  
XBP1  
PIP4K2C  
HDAC3  
PICK1  
CACNG2  
CPLX1  
UHMK1  
CSF2  
NCAN  
DDC  
NQO1  
AGA  
GABRA1  
SULT4A1  
GAP43  
GRIA4  
GRIK2  
GRIK4  
HMOX1  
HP  
HTR4  
APOD  
AR  
LTA  
MET  
MIR346  
NEFL  
PDE4A  
PIK3C3  
PLP1  
FXD6  
PON1  
GNB1L  
PPARA  
SLC17A6  
SLC6A2  
SMARCA2  
SP1  
NTNG2  
SELENBP1  
SYNGR1  
HTR3B  
CDC42

DGCR2  
SIRPB1  
CHGB  
GRIN3A  
ADCYAP1R1  
CNR2  
CSF2RA  
CTLA4  
ADRA2A  
CYP3A4  
DNM1  
EGR2  
MYT1L  
ASTN2  
ACSL6  
NCS1  
GABRG2  
PDE7B  
GCLM  
GLS  
MCHR1  
GPX1  
GRIN2C  
GRIN2D  
HK1  
HSPA1L  
IL6R  
IPO5  
MIR30E  
NRN1  
MAPK1  
MAPK3  
PSEN2  
KIF17  
PTPRZ1  
PINK1  
SLC1A4  
SREBF2  
TF  
TGFB1  
TNFRSF1A  
TYR  
TET1  
PTPN5  
DLGAP1  
NDST3

LINC00271  
ERVK-18  
ACTR2  
CTCF  
PPARGC1A  
CHAT  
CLU  
CCR5  
ADM  
SLC32A1  
CRYZ  
MAPK14  
CSF2RB  
CYP2E1  
EFNB2  
EGR4  
ELAVL2  
SIRT1  
LHX6  
MDGA1  
B3GAT1  
GLO1  
GNAL  
GRN  
GSTM2  
ICAM1  
IL3RA  
IL10RA  
AQP4  
JUN  
KCNQ2  
KPNA3  
NPSR1  
MIR206  
KMT2A  
MTNR1B  
MYO9B  
OPA1  
OXT  
PAFAH1B1  
PAX6  
PDYN  
RAPGEF6  
PI4KA  
ULK4  
RCBTB1

PTGS1  
RARA  
CCND1  
RHD  
SLC1A5  
SLC1A6  
SLC6A12  
TBP  
TGM2  
TLR3  
TNFRSF1B  
TYROBP  
VDR  
VIP  
VSNL1  
XRCC1  
CALB1  
DGCR6  
PPP1R9B  
DDO  
PLA2G4C  
RGS9  
PHOX2B  
ERDA1  
NRXN3  
CARTPT  
HDAC4  
ARHGEF11  
TSNAX-DISC1  
RANBP9  
PRSS16  
SEMA3A  
ADARB1  
PEMT  
LILRB1  
CHGA  
CHRM2  
CHRN2  
CSMD2  
CKB  
ACSM1  
CRH  
CSNK1E  
CTNND2  
ADRB3  
CYP3A5

DBI  
AGER  
DNMT3B  
ENO2  
EPHX2  
ALDH1A1  
FAAH  
FABP3  
FABP5  
FGFR2  
ADNP2  
SYT11  
DICER1  
FOLH1  
RASD2  
AMACR  
ALOX12  
STH  
GABRA6  
GABRB1  
NALCN  
GC  
GCH1  
NPAS4  
GFRA2  
NPTN  
CACNG5  
GCLC  
GNB3  
HTR3E  
GRB2  
GRIA3  
GRM4  
GSK3A  
GSN  
GSTA1  
HCRTR1  
HLA-DPB1  
HRH2  
HSPA9  
HTC2  
HTR1D  
IGF2  
IL2RA  
IMPA2  
KCNS3

BLOC1S3  
LASP1  
LMX1A  
LMX1B  
LPL  
LRP2  
LSAMP  
MIR17  
ARRB2  
SMAD5  
MDH1  
MICB  
MIF  
MTHFD1  
MTNR1A  
MYH9  
ATF4  
NDUFS1  
ATM  
NEUROG1  
NGFR  
NQO2  
NNMT  
NPAS2  
NPY1R  
NTSR1  
OPRK1  
OTX2  
PAK2  
PAWR  
SHANK1  
MED15  
PDGFRB  
ACP1  
PITX3  
PLAT  
PLG  
PNOC  
TREM1  
DYM  
PRKCA  
SLC7A10  
PANX2  
CDC42SE2  
LYRM4  
MIR432

PTPN1  
PTPRA  
PRODH2  
CACNG8  
NPS  
BCL2  
REST  
RGS2  
RGS10  
CTXN3  
SAT1  
BID  
SRSF1  
ETNPPL  
SLC6A13  
SLC25A1  
STX1A  
SYN1  
TACR1  
TACR3  
TAP2  
TDO2  
NR2E1  
TTR  
UCP2  
SCGB1A1  
VLDLR  
ZNF74  
SLC30A3  
LRP8  
ST8SIA4  
PLA2G7  
CAMK2B  
ESS2  
TRRAP  
STON2  
IL18R1  
HCAR3  
MBD2  
TOP3B  
HPS4  
SLC6A5  
DCLK1  
DLGAP2  
CD163  
SNAP29

ARHGAP18  
SLC25A27  
PRDX6  
HDAC9  
PLA2G4B  
DLG2-AS1  
MIR2682  
HNRNPA3P1  
CDK5  
CDKN1C  
AKR1A1  
CDC42EP3  
GAS2L1  
IGF2BP2  
CSPG5  
B3GNT2  
SRSF10  
PTPN21  
CHEK1  
FSTL1  
KLK8  
PADI2  
CHRM5  
GABARAP  
BTBD9  
C1QTNF3  
MSS51  
ADK  
ADORA1  
CLVS2  
B3GAT2  
CREBBP  
CREM  
CRMP1  
R3HDML  
CSNK1D  
HAPLN3  
CNIH3  
PDIK1L  
CTRL  
CTSK  
GRK3  
ADSS2  
DGKH  
DBN1  
SLC30A8



SNX31  
DIO3  
DLX1  
JAG1  
DUSP6  
ABCA1  
EIF2S1  
FBXO45  
EMX2  
EN1  
EN2  
ALDH3A1  
ACSL4  
FBP1  
HNRNPA3  
ALDH3B1  
FCGR2A  
SEMA3D  
FGF2  
PLEKHA6  
SBNO2  
MYO16  
NFASC  
FLNB  
VPS39  
FN1  
LARS2  
SIRT5  
GRIP1  
DAAM2  
CABIN1  
PADI4  
ALK  
FRA7G  
FUT8  
GABRA5  
GABRR1  
HSPA12A  
AUTS2  
FBXL21P  
OFCC1  
GFRA1  
GFRA3  
AP3M1  
CNPPD1  
TRMT2A

DKK4  
DKK3  
GLS2  
IL17C  
GPR78  
MCAT  
GLRA2  
IFNL3  
PLA2G4D  
GRK6  
GPS1  
GRB10  
GRIK5  
DROSHA  
GSS  
GSTT2  
DNMT3L  
IL19  
PSAT1  
H1-4  
H1-5  
H2AX  
HAGH  
HLA-J  
HMGA1  
APBA2  
APC  
HRH1  
HCAR2  
CYP26C1  
IDE  
APOH  
FAS  
IL2RG  
IL12B  
ITGB3  
JAG2  
JARID2  
NDUFS7  
KCNB1  
KCNH1  
KCNJ3  
KCNJ10  
KCNQ3  
KDR  
KIF2A

ARHGAP1  
LCN2  
LIFR  
FADS1  
LINC02694  
LRP1  
MIR107  
MIR130B  
MIR185  
MBNL1  
MC5R  
ME2  
CD99  
ASAH1  
ACHE  
TRPM1  
MMP3  
MOBP  
MIR326  
ATP6  
MTR  
RNR2  
MYO5B  
NDP  
NDUFV1  
NPAS1  
MIR382  
CLDN11  
GEMIN4  
CALY  
PCDH8  
PCK1  
DCDC2  
MSRB1  
GHRL  
PDZK1  
PHB  
SERPINI1  
FXD1  
PMP2  
SLC38A2  
DGCR8  
MAGEL2  
DLL4  
PPARG  
PPIA

PNPO  
PI4K2B  
PARL  
SOX6  
WDR11  
MCTP2  
ST6GALNAC1  
PAG1  
GABRQ  
MAPK8  
B2M  
PLSCR4  
TIGAR  
PTGDS  
PTGER3  
GJD2  
MIR497  
PTPN6  
PEX19  
RANBP1  
RBP1  
RELA  
ELOVL5  
ERVK-8  
S100A9  
ATXN2  
BIK  
PKNOX2  
SDHA  
SHMT1  
SHOX2  
USP46  
AGXT2  
WNK4  
WNK3  
SLC6A11  
SLIT3  
SNCB  
SPTBN2  
SRD5A2  
BRCA1  
BRCA2  
STXBP1  
BSG  
VAMP1  
VAMP2

VAMP7  
BTC  
TAC1  
KLF5  
TAP1  
TAPBP  
SNORD103C  
BTG1  
TCP1  
TFAP2A  
TGFB2  
THBS1  
TIMP4  
TLR2  
TSPAN8  
C1QA  
C1QB  
TPI1  
TPT1  
C4BPA  
C4BPB  
WNT2  
XRCC4  
CACNA1F  
CCDC86  
RETREG2  
PALB2  
PANK2  
CCDC68  
ADAM12  
LMAN2L  
TXNDC5  
ADAMTS12  
BRAP  
CASP3  
KREMEN1  
KAT8  
GNPAT  
MCHR2  
RGS5  
CGNL1  
ITGA8  
DIXDC1  
CAV1  
YWHAZP5  
TNFSF13

CBS  
CDK5R1  
PER3  
HERC2  
CCND2  
H2BC11  
NAV1  
NAV2  
EFCAB11  
MPZL1  
TMSB10  
MAG1  
GPR50  
NUMBL  
CD14  
CADPS2  
NRXN2  
FADS2  
HOMER2  
AKAP5  
ENTPD4  
CD48  
CELSR1  
SH3PXD2A  
RIMS2  
ARHGAP32  
RAPGEF5  
RIMS3  
RB1CC1  
SETDB1  
SEPTIN7  
SV2A  
OXSR1  
A1BG  
DEL22Q11.2  
ERVW-4  
NPRL2  
CELF2  
CETN1  
CHD4  
ADCY7  
SLC26A7  
KCTD12  
SLC26A8  
OR4C46  
COL3A1

FAM3D  
CP  
TEKT5  
ZNF480  
ZNF565  
SLC23A3  
SPATA5  
LPAR1  
EIF5  
HTR3D  
ADGRF4  
TRAK1  
CFAP65  
GABRA4  
GABRD  
ALS2CL  
BLOC1S1  
DAZAP1  
CBLIF  
LAMA1  
GRIN1  
SAP30BP  
HLA-E  
APOA4  
CCDC137  
ZNF530  
INPP5A  
ITGAM  
KPNA1  
GPR153  
LAMA2  
MIR219A2  
LMOD2  
MIR328  
DFNB47  
ND4  
PLL  
SDF4  
CDK16  
PML  
UGT1A3  
RNANC  
SBNO1  
EDEM2  
SEPTIN11  
RGS12

FASTKD5  
ACOT6  
ST3GAL1  
SNAP25  
KCNH6  
NRIP1  
CASP4  
KDM2B  
BHLHE40  
UNC5C  
SOCS2  
CCNA2  
ESAM  
ADAMTS3  
PITPNM1  
MAGEC1  
YWHAZ  
GOT2  
HIVEP2  
PPP3CB  
NCSTN  
CHST3  
ACTR3  
CTSC  
KDM1A  
ZNF521  
NGF  
ATP5F1C  
PPM1G  
KDM5C  
ASH2L  
SLCO6A1  
USH1G  
SLC39A8  
KALRN  
NT5C2  
ITIH4  
MECP2  
RBFOX1  
AS3MT  
ATXN1  
ZNF365  
SATB2  
SYNE1  
QPCT  
RENBP



CALB2  
EHMT1  
CALN1  
AKT3  
BTN3A2  
EFNA5  
CTNNA3  
HLA-DQA1  
MMP16  
FURIN  
MRTFA  
RAP1A  
SNCA  
TMTC1  
DGKZ  
CACNA1I  
GABBR2  
SNAP91  
FOXO6  
MSH5-SAPCD1  
RBM12  
DLC1  
CIB2  
CLCN3  
FAT3  
MSI2  
DECR1  
DNMT3A  
PDXDC1  
FOXO3  
ZFPM2  
SF3B1  
NEGR1  
SPATS2L  
FOXP1  
HLA-DMA  
HLA-DOB  
HLA-DRB5  
STT3A  
KIT  
KLC1  
ARHGAP4  
ARSA  
MEF2C  
NFATC3  
PRKN

NOSIP  
PIK3C2A  
LRP1B  
ATF7IP  
ANKS1B  
CAMK1D  
ADCK1  
SLC4A10  
NLGN4X  
PITPNM2  
ZSWIM6  
CADM3  
RARG  
RTN1  
ST3GAL3  
BCL11B  
UPF3B  
PCDH15  
TCF20  
YWHAG  
CACNA1D  
PRRC2A  
SPHKAP  
FXR1  
CUL3  
TAOK2  
SEC24C  
ZEB2  
TRANK1  
ZBED4  
MIR29B2CHG  
SLC8A1-AS1  
ZSCAN16-AS1  
CADM3-AS1  
ACTG1P22  
LINC00240  
LINC01004  
ENPP7P7  
SLC17A4  
LINC01539  
STARD4-AS1  
LINC01592  
PROX1-AS1  
LINC02551  
MUC22  
BORCS7-ASMT

CORO7-PAM16  
HSPE1-MOB4  
CKLF-CMTM1  
GPC6  
USH1C  
LINC00457  
TRIM10  
CDH13  
PDIA6  
FARP1  
RBM6  
LINC01470  
EP300-AS1  
LINC02466  
LINC01360  
LINC01877  
HDAC2-AS2  
KCNIP1-OT1  
SMIM15-AS1  
LIPC-AS1  
LINC01149  
TSBP1-AS1  
LINC01876  
MEF2C-AS1  
CXXC4-AS1  
LINC02109  
LINC01583  
MPHOSPH9  
ADAM10  
C2-AS1  
FLOT1  
KCNMB2  
DENND4A  
LINC01884  
LINC02188  
RERE-AS1  
LINC01905  
LINC02822  
STAG1  
BTN2A2  
LRRN2  
LINC02210-CRHR1  
IPO8  
LINC02326  
LINC02360  
LINC02829

LINC02571  
TTLL11-IT1  
LINC02033  
LINC02267  
LINC02264  
LINC02511  
LINC02797  
LINC02057  
SPTLC1  
ERLIN1  
RN7SL100P  
TSBP1  
ADCY1  
SLC17A3  
IQGAP2  
LINC02730  
LINC02055  
PDE10A  
HCP5  
ACTL7A  
EHMT2  
RAPGEF4  
TRIM31  
DNAJB4  
BTN3A1  
FOXN3  
BTN2A1  
RASSF1  
GRM3-AS1  
VPS45  
TWF2  
CHRNA2  
ZBED9  
OSBPL10  
H2BP5  
H3P40  
ERCC8  
PHACTR3  
AGAP1  
IP6K3  
C10orf90  
TMEM132D  
ANO4  
NRAD1  
HYKK  
TMEM219

OSCP1  
CNTNAP5  
RBM45  
ZFAND2B  
MTERF4  
C3orf49  
MUCL3  
LETM2  
COX11P1  
TRPM6  
RFLNA  
ZNF664  
LINC00637  
DSG4  
SLC9B1  
ZNF385B  
KLHL23  
CNTN4  
IGSF11  
AMOTL1  
CYP2D7  
FER1L6-AS2  
TTLL11  
CYP21A2  
DENND5B  
CCDC60  
CCDC122  
OTUD7A  
DBH  
AP2B1  
GSDME  
GLIS3  
PSORS1C1  
PSORS1C2  
ADAMTS16  
DNTT  
DPYSL2  
DRD5  
EIF4G1  
ELAVL4  
ANKRD23  
SPRED2  
EMX1  
EPHA5  
STX2  
ETF1

JMJD1C  
NSUN6  
CCDC162P  
LEMD2  
HS3ST5  
ZSCAN23  
FES  
R3HDM2  
ARSG  
EPN2  
EFR3B  
SORCS3  
PCNX1  
IGSF9B  
CNOT1  
DOP1A  
SAMD4A  
SMG1  
KDM4C  
TBC1D2B  
DDN  
FLI1  
ZCCHC14  
SMG6  
DNAJC13  
PPP1R13B  
MAU2  
ABCA5  
TTC33  
PLA2G15  
CADM2  
PRPF40B  
NGEF  
BACE2  
MOB4  
WHRN  
GALNT2  
MTHFD1L  
DNAH1  
SNED1  
LTN1  
PPP1R16B  
RAB11FIP5  
GIGYF2  
ARHGEF26  
EPC2

ZBTB20  
GBA  
CNNM3  
LAMP3  
B9D1  
TRAPPC3  
LSM1  
ZNF638  
GNG7  
SELENOH  
GP1BB  
JAKMIP3  
CDH20  
ZNF740  
MYO1H  
KSR2  
FAM177A1  
LINC00922  
TTLL6  
ZNF615  
C1orf167  
LINC00303  
CYB561D1  
C3orf38  
LINC00606  
FAM86B3P  
XKR6  
NSMCE2  
C11orf21  
GULOP  
HARS1  
KCNIP1  
ZNRD1  
HK2  
HLA-DMB  
HLA-DQA2  
HLA-DRB2  
HLA-DRB3  
HLA-DRB6  
HLA-DRB9  
RFESD  
TAAR6  
APBA1  
MROH2A  
CCDC39  
MSANTD1

EYS  
SOX2-OT  
FTCDNL1  
HCN1  
IL1RN  
INHBA  
KCNN2  
GUSBP2  
H1-12P  
TEX36  
UBE2Q2P1  
KRT81  
KRT83  
SNORC  
KRT86  
SFTA2  
LIN28B  
AFF3  
LIPC  
MIR100HG  
LMO7  
LINC00898  
LINC02232  
LINC00243  
VWC2L  
ARL3  
LRP4  
MTCO3P1  
MAN2A1  
MAP4  
ARSD  
DENND6B  
MGAT1  
CCDC88C  
LINC01239  
MSH5  
GGNBP1  
TRNE  
TRNS2  
MYH11  
MYO7A  
NAB2  
RERE  
NEK1  
NEU1  
NFATC2



NFIB  
NFKB1  
NPC1  
ATP2B2  
OPRD1  
CHST11  
CYHR1  
SLC45A1  
ASAP1  
NTM  
PBX2  
PCDH7  
ASCC1  
TMX2  
ZDHHC9  
CKLF  
ZDHHC2  
FAM178B  
PCDH12  
FAM53C  
COMMD10  
SFMBT1  
MPP6  
SUFU  
KDM3B  
PEPD  
PGC  
PLCB4  
PLCL1  
SNTG1  
ZFAND6  
LRRN3  
RRN3  
TET2  
GIPC2  
NSD3  
TTC12  
SPATA6L  
RBM23  
MSTO1  
ARHGEF10L  
SMPD3  
MAML3  
ZNF823  
GALNT10  
CARMIL1

PRKAA1  
TENM3  
WDR12  
ARHGAP15  
PRKD1  
PRKG1  
PRRG2  
PSAP  
PAK6  
PSMB9  
BBX  
PTGIS  
TENM2  
GRAMD1B  
HECW2  
SIPA1L2  
CACHD1  
CWC22  
PTPRF  
PTPRN2  
SCAF1  
MPP4  
TRIM27  
RGS4  
EXOC4  
RORA  
RPL37  
RPN2  
RREB1  
ATXN7  
SCN4A  
PRDM14  
CDH23  
RBKS  
MROH6  
TRAF3IP2-AS1  
SGCD  
CPEB1  
LINC00461  
GIGYF1  
NDRG4  
FER1L6  
SLC17A1  
BMPR1B  
BNIP3L  
SPG7

SRPK2  
STAU1  
CNTN2  
TBXAS1  
TEAD1  
TEP1  
TH  
TSPO  
NKX2-1  
C2  
CCDC192  
HIRA  
SHISA9  
USH2A  
CLRN1  
TRIM26  
ZSCAN9  
CACNA1S  
ALMS1  
GID4  
CENPM  
LILRP2  
MAIP1  
CORO7  
FAM184A  
GTDC1  
GRTP1  
CARF  
CCDC102B  
TUSC3  
PDZD7  
ATAT1  
SEMA6D  
LRRTM4  
CCDC170  
THOC7  
UXS1  
IFT74  
BRD3  
SPG11  
COQ10B  
ZKSCAN3  
EEPD1  
TMPRSS5  
TAF15  
OR5V1

OR12D3  
SEH1L  
ZNF93  
H2AC10P  
H2AC6  
H2BC15  
KATNAL2  
IMMP2L  
ADGRV1  
BCAR3  
CEP78  
SLC7A6OS  
CMAHP  
STK24  
COA8  
MAML2  
MYO18B  
AGBL4  
LINGO1  
HAT1  
PLPP1  
EIF3F  
NOL4  
STK19  
ARHGEF7  
HIP1R  
ATP6V1E2  
SLC7A6  
DNAJA3  
NEURL1  
PCED1B  
C12orf65  
DGKI  
CABLES1  
RFT1  
NDUFAF2  
SNX29  
LRRFIP1  
SPECC1  
ADIPOQ  
TGFBRAP1  
HS6ST1  
POM121L2  
SFXN5  
MED26  
AKAP6

STXBP5L  
MRPL33  
CEP41  
CD40  
RGS6  
RALGPS1  
PLCH2  
PRORP  
DCAF1  
ZNF536  
CLSTN3  
TBC1D5  
CTIF  
DMTF1  
CFP  
PDLIM7  
TBC1D9  
GSTK1  
PIK3CD  
SGCG  
TSHZ1  
PLB1  
HMBS  
CXCL8  
MFGE8  
BDNF-AS  
PIK3CG  
POMC  
ACKR3  
CCL11  
ECT  
CXCR6  
ADRA2B  
EDNRA  
ELK3  
SHANK2  
GPR42  
HLA-DQB2  
HSPA4  
IGF1  
APP  
MARK1  
PLA2G2A  
PGPEP1  
PRCP  
BMP1

SSTR4  
BRS3  
CALM2  
CALM3  
CAT  
LPAR2  
CLINT1  
CDK9  
RTN3  
KAT5  
SERPINA3  
EGFR  
FKBP5  
ACACA  
HTR1B  
MIR132  
CHPT1  
RARB  
SAFB  
SNRNP70  
CAMKMT  
DHDDS  
EBPL  
APOL1  
KRIT1  
BMS1  
KLF6  
OR2AG1  
DGCR  
DMD  
DNASE1L3  
DUSP2  
EP300  
F2R  
IL17A  
MIR34A  
NOS3  
ATP5F1A  
PRS  
PTPN4  
RAC1  
SCN2A  
ACTG1  
PARP9  
PSMG1  
SCZD13

LINC01672  
FXVD6-FXVD2  
GPHN  
LOC107987479  
STIN2-VNTR  
CIT  
ACOT7  
MRGPRX3  
MRGPRX4  
MAP3K8  
GPR151  
COX8A  
CRYGD  
CUX1  
CYP2B6  
CYP2C19  
DAXX  
OXER1  
DRP2  
EPHB1  
EPHB2  
EPO  
ALDH2  
GPRC6A  
SYNM  
MACF1  
FOS  
LPAR3  
MRGPRX1  
GAPDH  
GHR  
GLP1R  
HCRT  
GOLGA6A  
ACTBL2  
APRT  
INSRR  
LEPR  
SNX19  
MIR183  
MIR195  
MFAP1  
POTEKP  
VN1R17P  
GPR166P  
COX1

P2RX7  
PAK3  
MZB1  
PITX2  
GPR88  
PPT1  
PNPLA2  
KIDINS220  
LGR6  
POTEM  
LINC00273  
SMS  
SULT1E1  
NEK4  
TERC  
THOP1  
SERPING1  
ACTG2  
WAS  
CNBP  
CXCR4  
NPL  
FZD4  
FHL5  
SLC12A6  
MGS  
OCLN  
ABCB6  
OPN1MW3  
CDK4  
CLEC10A  
CECR  
ARFGEF1  
ARID3B  
GNA13  
PTGES3  
LYVE1  
LOC110806262  
WDHD1  
CHP1  
SYNPO  
GRIN3B  
BORCS7  
COL2A1  
PPARGC1B  
RSS



CRYM  
CSNK2B  
CSPG4  
CX3CR1  
PPM1K  
ADRB2  
SLC35G1  
DAB1  
DHX9  
DES  
ATN1  
AGT  
DTNB  
ARID2  
A2M  
ALB  
FABP4  
FBN1  
FAN1  
ALDOC  
MCF2L  
TARDBP  
ANGPTL2  
SDF2L1  
IL27  
KCTD13  
CALHM1  
TPSG1  
AMBP  
ASPM  
BLOC1S6  
GNL3  
OPN1MW  
GH1  
GIPR  
CNTN6  
RABGEF1  
DESI1  
GLUD1  
OR10A4  
UTS2R  
ANGPT2  
DLL1  
REM1  
PYCARD  
A1CF

H2AZ1  
HCL2  
HNMT  
HSPA8  
HSP90AA1  
HSPG2  
APOA1  
NANOS1  
IGFALS  
IL2RB  
ISG20  
ITGA2B  
MALAT1  
L1CAM  
LAMC2  
LGALS3  
LIF  
LPP  
MIR219A1  
MIR223  
MARCKS  
MAPT  
MAS1  
MDM2  
MEF2A  
MDD1  
ASIP  
MIAT  
ASPA  
MSMB  
MTRR  
NEFM  
NF2  
NHS  
NPTX2  
NTF4  
NUP98  
OGG1  
ALDH7A1  
PEBP1  
SERPINE1  
IL22  
RSRC1  
PDE2A  
PDGFB  
SERPINF1

SERPINA1  
PMP22  
TLR9  
SEPTIN4  
TREM2  
GPR85  
TERF2IP  
POU3F2  
CHDH  
PRKCD  
GLT8D1  
PRNP  
C21orf62  
PRSS3  
PSMD9  
AICDA  
ERMN  
PCDH19  
PTK7  
SEMA6A  
DLGAP3  
RASGRF1  
RIT2  
HAPLN2  
RXRB  
CCL4  
CCL17  
SCZD2  
SH3GL2  
SMARCA1  
TMEM108  
SOS1  
SPTAN1  
STAT1  
STATH  
C3  
C4A  
C4B  
OPN1MW2  
TXN  
TYMS  
UBE2N  
UCHL1  
UQCRC1  
VIM  
VWF

CA2  
FTO  
MCPH1  
NR4A3  
CAMK2A  
PLA2G12A  
SLC14A2  
ADAMTS10  
SPRY4  
ROPN1L  
PKP4  
GAS7  
DLK1  
CCKBR  
SKAP2  
ARHGAP11B  
IL33  
CD9  
GPR52  
KL  
SLC9A3R1  
CD28  
ABCG2  
ATG5  
GDF15  
NAT2  
ADA  
NAALAD2  
DDTL  
TLX1NB  
SRA1  
MIR936  
MIR708  
TSTD1  
DIP  
AUTS1  
WASHC1  
ZNF729  
C4B\_2  
MIR1288  
MIR1307  
MIR1271  
MIR664A  
FAS-AS1  
MIR3162  
P2RX5-TAX1BP3

MIR4449  
ERVK-20  
SPRY4-IT1  
IFNG-AS1  
CDH11  
COMETT  
NOTCH2NLC  
NOTCH2NLB  
CDH15  
BCAP31  
AKAP9  
EBI3  
WASF2  
ALYREF  
RIDA  
HCG9  
CDKN1A  
CDK2AP2  
LOC102723407  
LOC102724334  
CBSL  
LOC102724971  
STUB1  
TPTEP2-CSNK1E  
CDKN2A  
MARCHF6  
KATNB1  
TUBA1B  
MYL12B  
IFITM3  
VAV3  
BAIAP2  
ATP5PD  
NXF1  
UNC13B  
SEMA4B  
THRA1/BTR  
UPK3B  
CERNA3  
ARL6IP5  
SORBS1  
TXNRD2  
AHSA1  
TRIM3  
TXNIP  
FMR1-IT1

EBP  
MTCO2P12  
TBR1  
CFL1  
NES  
KDM5B  
ZMYND11  
CGA  
ALDH1L1  
PGRMC1  
SLC26A1  
WDR3  
UTS2  
SUB1  
EHD1  
HNRNPA0  
TMED2  
MLLT11  
RAB40B  
TMED10  
DM1-AS  
METAP2  
IMMT  
SLC38A3  
SLC27A5  
ERVK-32  
STMN2  
TPPP  
RPP14  
CD160  
CAPN10  
NISCH  
HRH3  
IL17F  
LYST  
CHRM3  
CDCA5  
COPE  
CHRNA1  
TXNRD3  
SLITRK1  
H3P8  
H3P24  
H3P19  
TBCB  
ARHGAP33

PANX3  
APOA5  
AGAP3  
TMC2  
EXOSC6  
COMTD1  
ADD2  
CLTB  
H4-16  
DEGS2  
NIPA1  
ADH5  
COL9A3  
GLYCTK  
CORT  
CPOX  
CPS1  
UBXN2B  
CRHBP  
CRHR2  
CRIP1  
CRIP2  
CRK  
BPIFA2  
CRY1  
NRSN1  
CRY2  
ISM1  
SIRPA  
CRYBB1  
CRYBB2  
PARP1  
PIWIL4  
PWAR1  
CSNK2A1  
NRG4  
ADRA1D  
CST3  
LYPD4  
ADRA2C  
KCTD7  
CYP2C9  
CLVS1  
CYP19A1  
DAP  
BRINP1

MARCHF10  
DCR  
DCX  
ARX  
FUT11  
DHFR  
AFM  
DIAPH2  
DLD  
ACAN  
DNAH9  
DNASE1  
DNASE1L1  
DOCK1  
DPYS  
AGRP  
DR1  
AGTR1  
EDA  
S1PR1  
EIF2D  
EIF2S3  
EIF4A2  
ELANE  
GABRR3  
AK1  
TUBB  
EPB41L1  
EPHB4  
ERBB2  
ERCC5  
ERG  
AKT2  
ESD  
ESRRA  
ETFA  
ALAS1  
EXT1  
ALCAM  
EZH1  
EZH2  
F5  
F10  
PTK2B  
FARSA  
FAT1



OPN5  
FCN2  
FGA  
FGF9  
FGF10  
FGF14  
FGFR3  
FH  
FKBP4  
FOXG1  
MMRN1  
SEPHS1  
RAB3GAP1  
DKK1  
P2RX2  
TRIM32  
PDCD11  
ABCF1  
GOLGA8A  
NCOA6  
EPB41L3  
SEPTIN6  
MAPK8IP3  
STAB1  
FLT1  
TBC1D1  
FBXO28  
ANKRD12  
POFUT2  
WWC1  
CUX2  
ABCB9  
BRD4  
POFUT1  
FOSB  
SEC14L2  
CDC42EP4  
SMUG1  
PDSS1  
CD2AP  
FXN  
FRA6F  
PANX1  
FRAXA  
FUCA2  
G6PD

YTHDF3  
GABPA  
LRRC57  
GABRG1  
TBC1D22A  
SPDEF  
GALC  
PART1  
MXRA5  
RNF19A  
ATL3  
CNRIP1  
AOC1  
MOXD1  
POLDIP2  
GART  
FGF21  
GBP1  
GCHFR  
AMELX  
GCSH  
ELP4  
GGTA1P  
GHRH  
CYFIP2  
LAT  
NSG1  
CACNG4  
EIF2AK1  
CYTH4  
NDOR1  
AGO2  
GNMT  
APEX2  
GLDC  
TMEM97  
SGSM3  
PCLO  
GLUD2  
AMY1A  
GMFB  
GNAQ  
GNB1  
ABO  
GPC1  
NEAT1

KCTD21  
TTC9C  
PGP  
GPR17  
ENDOV  
CXCL17  
MIF-AS1  
SUMF1  
TRBV7-2  
TMED10P1  
TRBV2  
GPT  
IGLV3-25  
LAMTOR2  
GIT1  
SETD2  
SLC25A4  
TAGLN3  
CXCL1  
GRP  
GSPT1  
GTF3A  
GUK1  
GUSB  
PADI1  
GYPC  
ANXA1  
H3-3A  
H3-3B  
HABP2  
HSD17B10  
HAL  
HCFC1  
ANXA3  
HTT  
CFH  
VSX1  
ANXA6  
HIF1A  
UBE2K  
HLA-DRA  
HLA-G  
NR4A1  
HNRNPC  
HNRNPD  
HNRNPK

HNRNPU  
HPD  
HPS1  
HSD11B2  
HSPA5  
HSPD1  
DNAJB1  
IARS1  
CLEC4D  
ICAM3  
NAT8L  
ATP13A5  
IFNB1  
IFNGR2  
TUBB2B  
IGFBP4  
ACADS  
IGHG1  
IGHG3  
RBPJ  
IL1R1  
IL6ST  
IL9  
IL9R  
IL12A  
AQP3  
IL15RA  
INSR  
IRF3  
ISL1  
ITGB1  
ITGB4  
ITGB5  
ANOS1  
CLAM  
ARF1  
KCNQ1  
KIF5A  
KIR3DL2  
KNG1  
KRT7  
CCL4L1  
NOTCH2NLA  
KTN1  
RPSA  
STMN1

LBP  
LCK  
LCN1  
LCT  
MUC21  
LGALS1  
LIG4  
LNPEP  
HAPLN4  
LINC01194  
PHOBS  
ARNT  
CYP4F3  
MIRLET7G  
MIR125B1  
MIR126  
MIR144  
MIR146A  
MIR15B  
MIR184  
MIR193A  
MIR198  
MIR19B1  
MIR200C  
MIR204  
MIR212  
MIR22  
MIR25  
MIR301A  
MIR30A  
MIR30B  
MIR320A  
MIR9-2  
MIR98  
SMAD3  
SMAD4  
STS  
MAP1A  
MAP1B  
MC2R  
MC4R  
MCC  
MCM7  
CD46  
ADAM11  
ASCL1

MLLT3  
NR3C2  
MNAT1  
MPI  
MPP2  
MPZ  
MS  
EIF2AK4  
CDNF  
MIR338  
MST1  
MT1B  
PLF  
COX2  
ND1  
ND5  
MTTP  
MUC1  
ASTN1  
MYD88  
SERPINC1  
MYO1D  
ATF3  
NDUFB5  
NDUFS3  
NDUFS6  
NDUFV2P1  
NEDD4  
SEPTIN2  
NEFH  
NEUROD1  
NEUROD2  
NFE2L2  
NMBR  
NONO  
NOS2  
NOTCH2  
NOTCH3  
NOVA1  
NPPA  
NPTX1  
NPY2R  
NRAS  
NRCAM  
NUCB2  
ATP2B4

NVL  
TNFRSF11B  
OPRL1  
ACO2  
P2RX1  
P2RX3  
P2RX4  
P2RX5  
P2RY1  
P2RY2  
P4HB  
PAEP  
ITSN2  
HP1BP3  
DHH  
F11R  
PCCB  
TMED5  
SERPINA5  
ST8SIA3  
PCMT1  
MECR  
ANGPTL4  
INSIG2  
HSD17B12  
AADAT  
BFAR  
TLR7  
RASL12  
PCYT1A  
HOOK1  
PLA1A  
SUCO  
PDE9A  
SCLY  
IL23A  
SRRT  
SF3B6  
TPPP3  
PENK  
PFKM  
ATP6V1A  
PGK1  
SERPINA4  
PKHD1  
PLA2G5

IL17D  
PLCG1  
PLEC  
SERPINF2  
PLXNB1  
PLXNB3  
PMCH  
PMM2  
CNTN5  
SEPTIN5  
H2BS1  
POLR2A  
NLGN3  
ANLN  
KRT20  
POU3F1  
CCHCR1  
UGT1A8  
POU5F1  
MINDY2  
CRLS1  
GATAD2A  
WBP1L  
NCAPG2  
ACP3  
MARCHF1  
WDR60  
PPP2CA  
GOLPH3L  
PTPA  
CCDC25  
PPP3CA  
TMEM176A  
MEG3  
H4C15  
PREP  
GPRC5D  
KIF21A  
PPP1R9A  
IPO9  
PRKAR1A  
PRKAR2B  
MBD5  
CACNA2D3  
LRP2BP  
PRKCG



USE1  
GPRC5C  
LANCL2  
MAPK4  
NSFL1C  
CFC1  
MYDGF  
MAP2K1  
ALG1  
PCDHA1  
PSPN  
BTNL2  
CTNBL1  
KYAT3  
PROS1  
EIF4ENIF1  
KCNQ5  
RETN  
PSMB6  
PYY  
FAM20C  
MAN1C1  
PSMD10  
VARS2  
PSPH  
TAS2R38  
PTEN  
BAGE  
MIR485  
AMIGO1  
ESYT2  
HEG1  
MRTFB  
LRFN2  
CHD8  
SUGP1  
POLD4  
GRHL3  
PTPRG  
PTPRZ2  
PURA  
PVR  
CXCL16  
BBS4  
KMT2C  
MOK

BCHE  
RANGAP1  
IL21  
ACE2  
CACNG6  
HRH4  
SCPEP1  
RBP4  
REG1A  
REN  
RFX1  
RLBP1  
RNH1  
GAS5  
TNFRSF17  
RORC  
OPN1SW  
RPA1  
RPL3  
RPL13  
MBOAT4  
RPS6KA3  
RPS10  
RPS19  
SORT1  
S100A10  
S100A11  
CFB  
ATXN8OS  
SCD  
CCL21  
CCL22  
SCZD1  
BCAN  
CXCL12  
BLOC1S5  
SCZD10  
KIF13A  
NEUROG2  
SELL  
MCCC2  
LRRRC4  
VSIR  
SELENOP  
SET  
POU5F1P3

SRSF6  
SRSF7  
SFSWAP  
SGK1  
H3P16  
BLVRB  
POU5F1P4  
SHBG  
GINGF2  
NUCKS1  
PDIA2  
NT5DC2  
SKIL  
SKP1  
SLC2A3  
UBE2Z  
WASH6P  
GSTT2B  
BMP6  
IQCJ  
SLC16A1  
SMN1  
SMN2  
SNRPN  
SORL1  
DST  
SPARC  
SPN  
SPR  
SRF  
SRM  
SRPRA  
SRY  
SSTR5  
STAR  
STRN  
STXBP3  
SULT2A1  
ADAM17  
TAL1  
TBCD  
HNF1B  
ZEB1  
BTN1A1  
TRGVB  
TCTA

ACTC1  
PRDX2  
TERT  
TFPI  
TGFB2  
TGFB1  
THAS  
THBD  
THRA  
THRB  
TIMP1  
TIMP2  
TIMP3  
TKT  
TLR1  
TLR5  
TOP1  
TPO  
TPP2  
TRC-GCA24-1  
CCT3  
TRIO  
TSC2  
C5  
TTN  
SNORD118  
POTEF  
MEIKIN  
OIP5-AS1  
CCR2  
TYRP1  
UBE2D1  
UBE3A  
SUMO1  
UCP1  
VPS51  
VCAM1  
BEST1  
TRPV1  
VRK1  
DAGLA  
WNT1  
WNT3  
WNT7A  
XPC  
XRCC3

YY1  
YWHAB  
ZNF45  
CACNA1A  
DNALI1  
PSS  
CACNB4  
IL1R2  
FZD5  
SLC25A20  
GGCT  
NUP37  
DEK  
PLEKHF1  
EFHD2  
MMEL1  
EPM2A  
SLC52A2  
AIMP2  
SNIP1  
ZNF750  
ALG9  
HDAC11  
NANOG  
CNTNAP3  
SYNDIG1  
DNAJC5  
SRCIN1  
ZBP1  
CALR  
SLC7A5  
SLC38A1  
NETO1  
MIA  
CAMP  
USP9X  
H4C9  
PICALM  
FZD1  
FZD7  
CASP1  
H3C6  
CHST9  
H4C1  
H4C4  
H4C6

H4C12  
H4C11  
H4C3  
H4C8  
H4C2  
H4C5  
H4C13  
H4C14  
LOH19CR1  
PLA2G10  
TMPRSS13  
ULK1  
STX7  
ATP13A4  
BBOX1  
NR0B2  
SARNP  
CDC42BPA  
LMNB2  
PHF5A  
FBH1  
UBASH3B  
ATCAY  
TRIM5  
BCAS1  
SLC22A16  
RUNX1  
USO1  
KCNK5  
RIPK2  
CES2  
KYAT1  
TMEM11  
CCN6  
DLEU2  
KAT2B  
NR1I2  
FUBP1  
EIF2S2  
ENDOU  
SNURF  
BSN  
WASF1  
LMLN  
SLC25A14  
CCNH

CCRL2  
MAP7  
CLDN12  
CLDN1  
CCT6A  
ATP6V0D1  
INA  
P2RX6  
PKDCC  
ISX  
CHURC1  
ARHGEF2  
CD4  
ZMYM3  
XPR1  
VAPB  
ASB16  
CD8B  
PIWIL1  
MARCHF9  
CD19  
MS4A1  
KLF4  
TRIP13  
TRIP4  
TGM5  
TCEAL1  
LHX2  
KIF3B  
COX5A  
GRAP2  
ZRANB2  
GSTO1  
ARHGEF6  
CABP1  
CD36  
CHST10  
TBX4  
ADAMTS4  
ADAMTS2  
TBPL1  
CD38  
GOSR1  
NRG2  
CCL4L2  
ABCG1

IQCB1  
CD59  
CD68  
VGLL4  
RAPGEF2  
ULK2  
GPRIN2  
CD79A  
ZSCAN12  
FRMPD4  
TOX  
KIAA0513  
PCLAF  
RNF40  
SF11  
DNAJC6  
KIAA0319  
ARNT2  
WDR1  
NR1H4  
THOC1  
HNRNPDL



Table S5: Height risk genes

ACAN  
ADAM28  
ADAMTS10  
ADAMTS17  
ADAMTS3  
ADAMTSL3  
AK092571  
AKD1  
AL117656  
AL161980  
ANKRD13B  
ATP6V1E2  
B3GNT8  
BC030091  
BMP2  
BMP6  
BNC2  
BRCA1  
C17orf42  
C17orf82  
C20orf199  
C3orf63  
C6orf1  
C6orf173  
CCDC100  
CCDC108  
CCDC66  
CCDC91  
CDK2AP1  
CDK6  
CLIC4  
CLPS  
CPN1  
CWF19L1  
CYP19A1  
DDX27  
DNM3  
DTL  
DYM  
ECM2  
EFEMP1  
EIF2AK3  
ESR1  
ETV6

EXOSC5  
FAM173A  
FANCE  
FARP2  
FBLN2  
FBXW11  
FGFR4  
FLI1  
FNDC3B  
FOLH1  
FRS2  
FUBP3  
GDF5  
GH1  
GHSR  
GNA12  
GNPTAB  
GPC5  
H1FX  
HAGHL  
HDLBP  
HHIP  
HLA-\_\_B  
HMGA1  
HMGA2  
HSS00017874  
HSS00085450  
HSS00174467  
ID4  
IGF1R  
IGF2BP2  
IGF2BP3  
IHH  
INSR  
INTS7  
ITPR3  
JMJD4  
KCNQ1  
L3MBTL3  
LIN28  
LIN28B  
LPAR1  
LRRC37B  
LTBP1  
LTBP2  
LUZP1

MC4R  
MEF2C  
MFAP2  
MICA  
MKL2  
MSTP9  
MTMR11  
MYO9B  
N4BP2L2  
NFATC4  
NFIC  
NME2  
NOG  
NPPC  
NPR3  
NSD1  
NUCB2  
PAPPA  
PAPPA2  
PCSK5  
PDS5B  
PEX2  
PFAAP5  
PIP4K2B  
PIP5K2B  
PITX1  
PKN2  
PML  
PPA2  
PPAP2A  
PPARD  
PPIF  
PRKCZ  
PRKG2  
PSMB3  
PTCH1  
PTPRJ  
QSCN6L1  
QSOX2  
REST  
RMI1  
RNF135  
RPL5  
RUNX2  
RYBP  
SCMH1

SLBP  
SLC22A4  
SLC22A5  
SLC23A3  
SLC39A13  
SLIT3  
SMPD2  
SNAP47  
SOCS2  
SOCS5  
STAT2  
STK36  
TBX2  
TCF19  
TEAD1  
TGFB2  
TMEM4  
TNS1  
TP53I13  
TRIP11  
TSEN15  
USP52  
UTP6  
VGLL2  
VPS13C  
ZBTB24  
ZNF142  
ZNF311  
ZNXF1

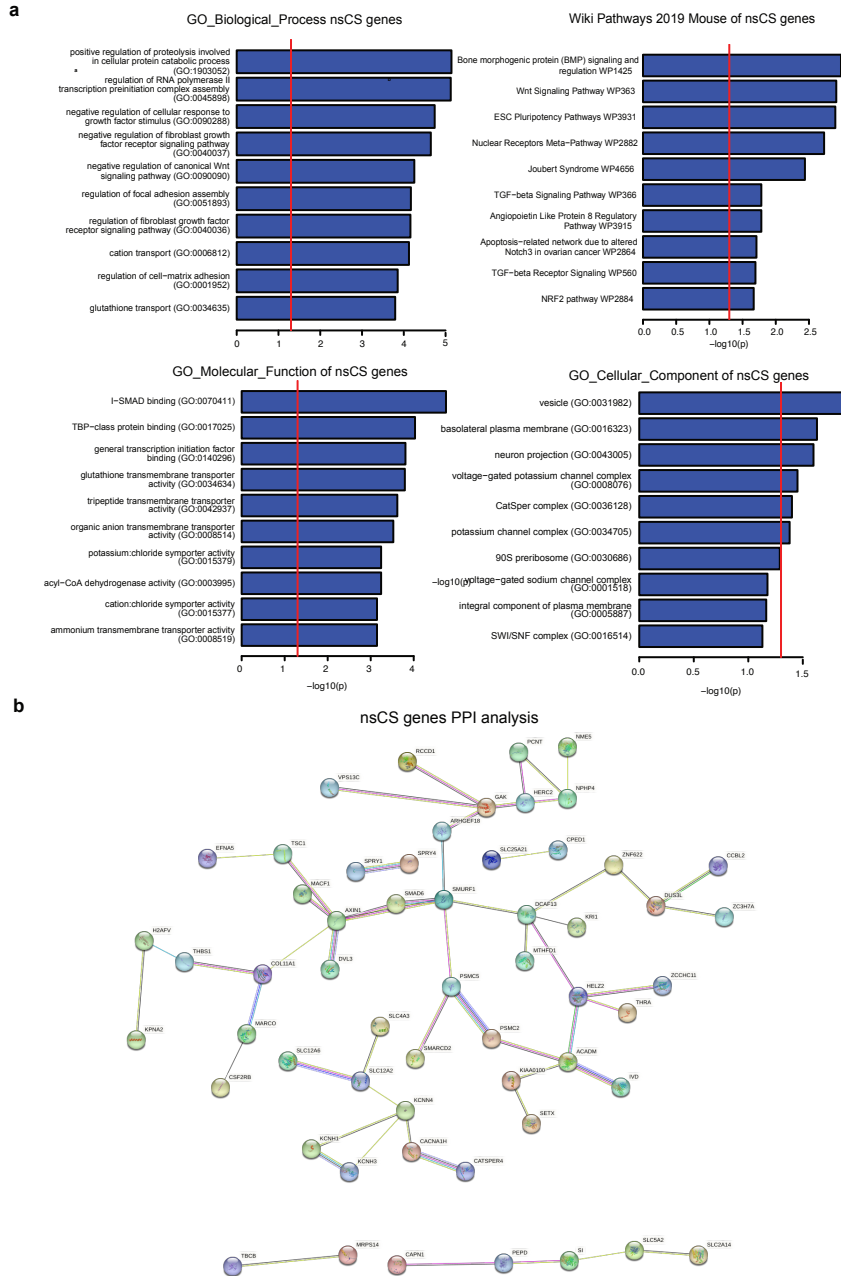

**Figure S1: Pathway and protein-protein interaction analyses of nsCS genes.**

- a) Wiki pathway, GO biological processes, cellular component and molecular function analyses for nsCS genes. Dotted red line indicates threshold p-value of 0.05.
- b) Protein-protein interactions for nsCS genes. See Szklarczyk D, Kirsch R, Koutrouli M, et al. The STRING database in 2023: protein-protein association networks and functional enrichment analyses for any sequenced genome of interest. *Nucleic Acids Res.* 2023;51(D1):D638-D646.

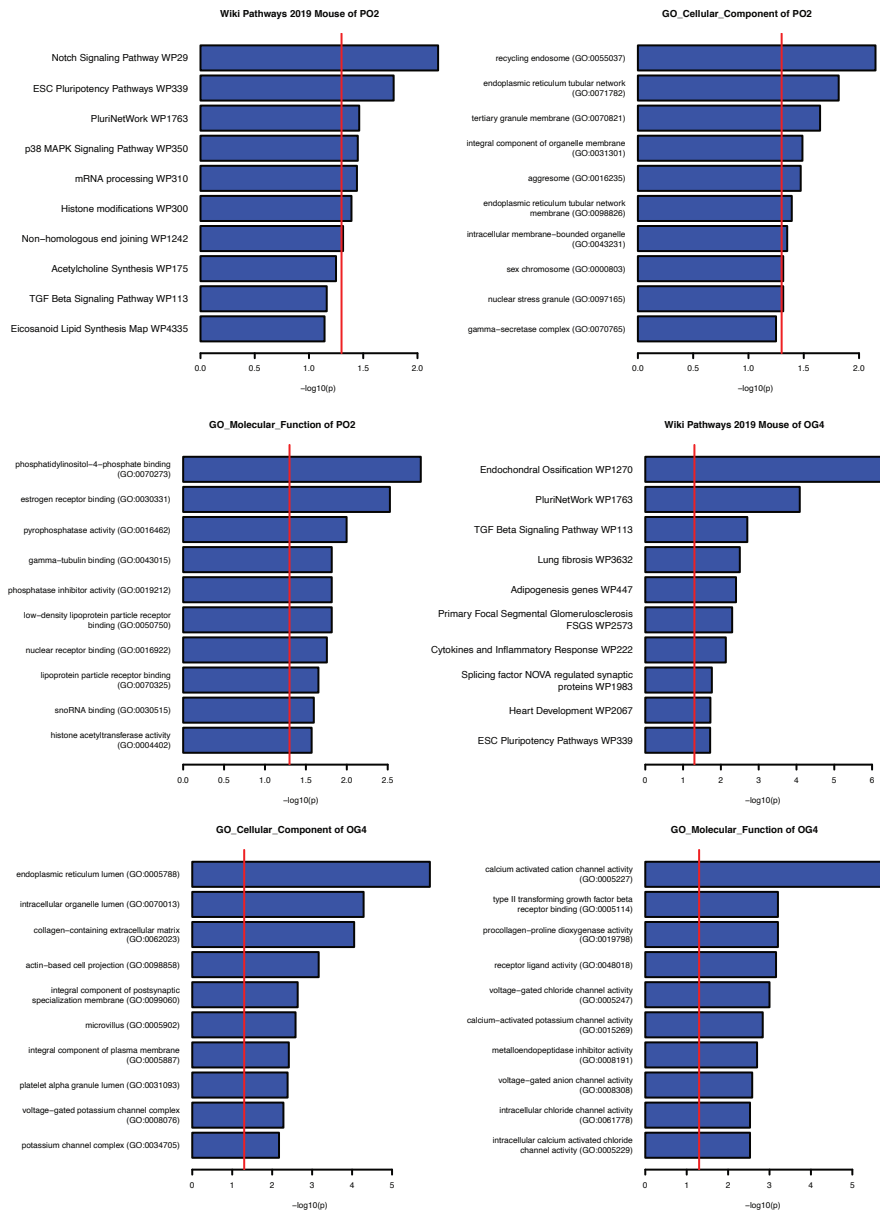

**Figure S2: Pathway analyses of cell types enriched with nsCS genes in scRNAseq developing suture dataset.**

Wiki pathway, GO cellular component and molecular function analyses for top genes in nsCS-enriched proliferative and mature osteogenic clusters. Dotted red line indicates threshold p-value of 0.05.

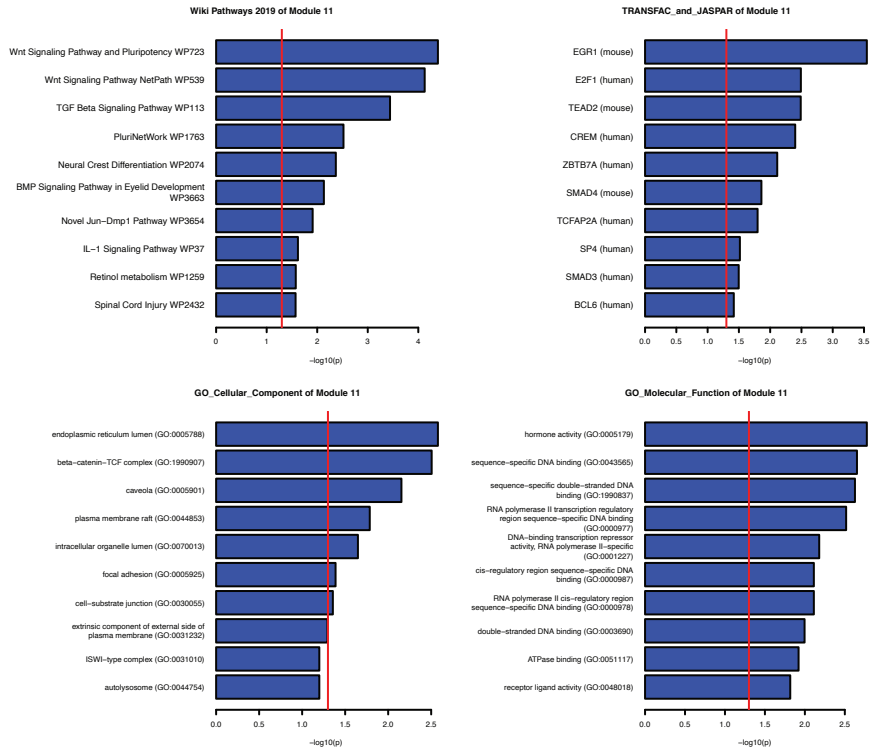

**Figure S3: Pathway analyses of modules enriched with nsCS genes in scRNAseq developing suture dataset.**

Wiki pathway, TRANSFAC/JASPAR transcription factor, GO cellular component and molecular function analyses for top genes in nsCS-enriched module 11. Dotted red line indicates threshold p-value of 0.05.

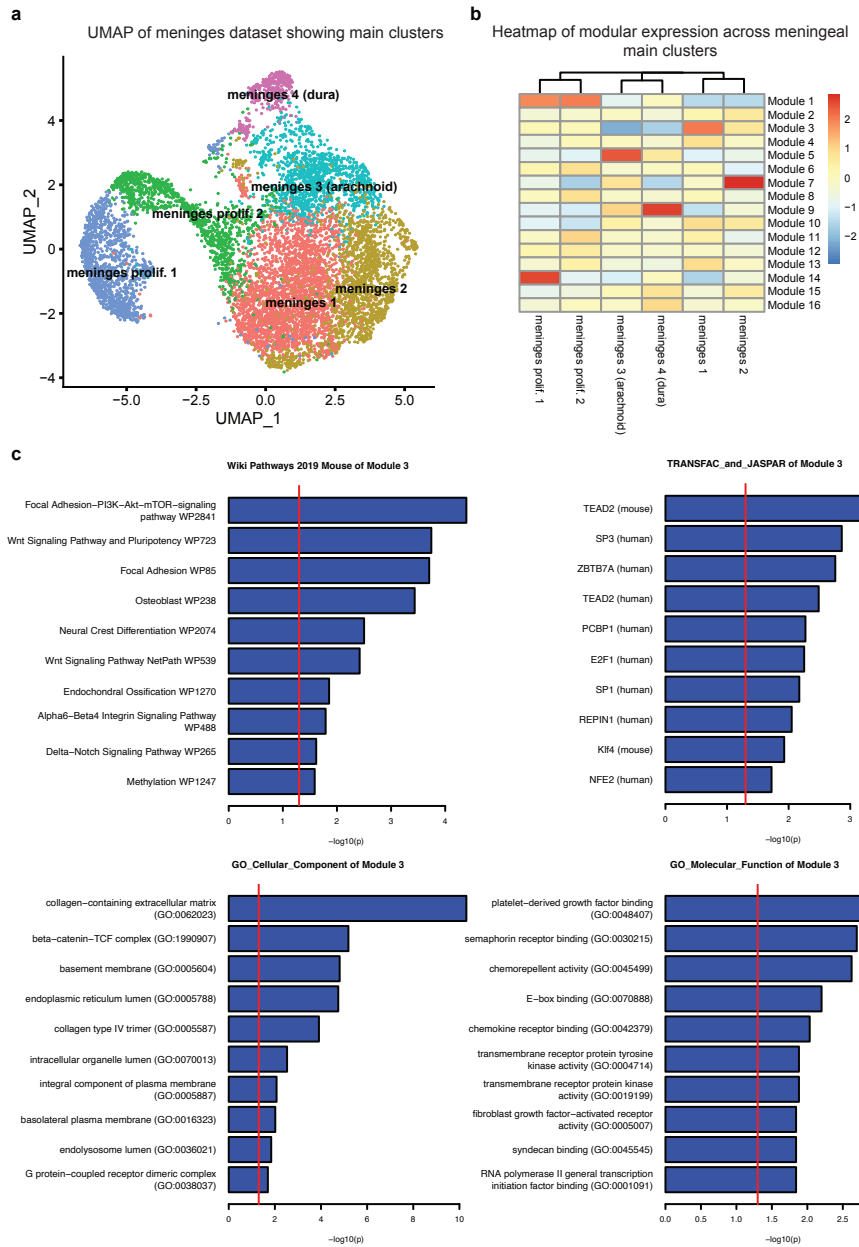

**Figure S4: scRNAseq developing meninges dataset clustering, modular mapping and pathway analyses.**

- UMAP clustering of developing mouse meninges cells.
- Heatmap of gene co-expression modules across individual cell types in developing mouse meninges.
- Wiki pathway, TRANSFAC/JASPAR transcription factor, GO cellular component and molecular function analyses for top genes in nsCS-enriched module 3. Dotted red line indicates threshold p-value of 0.05.



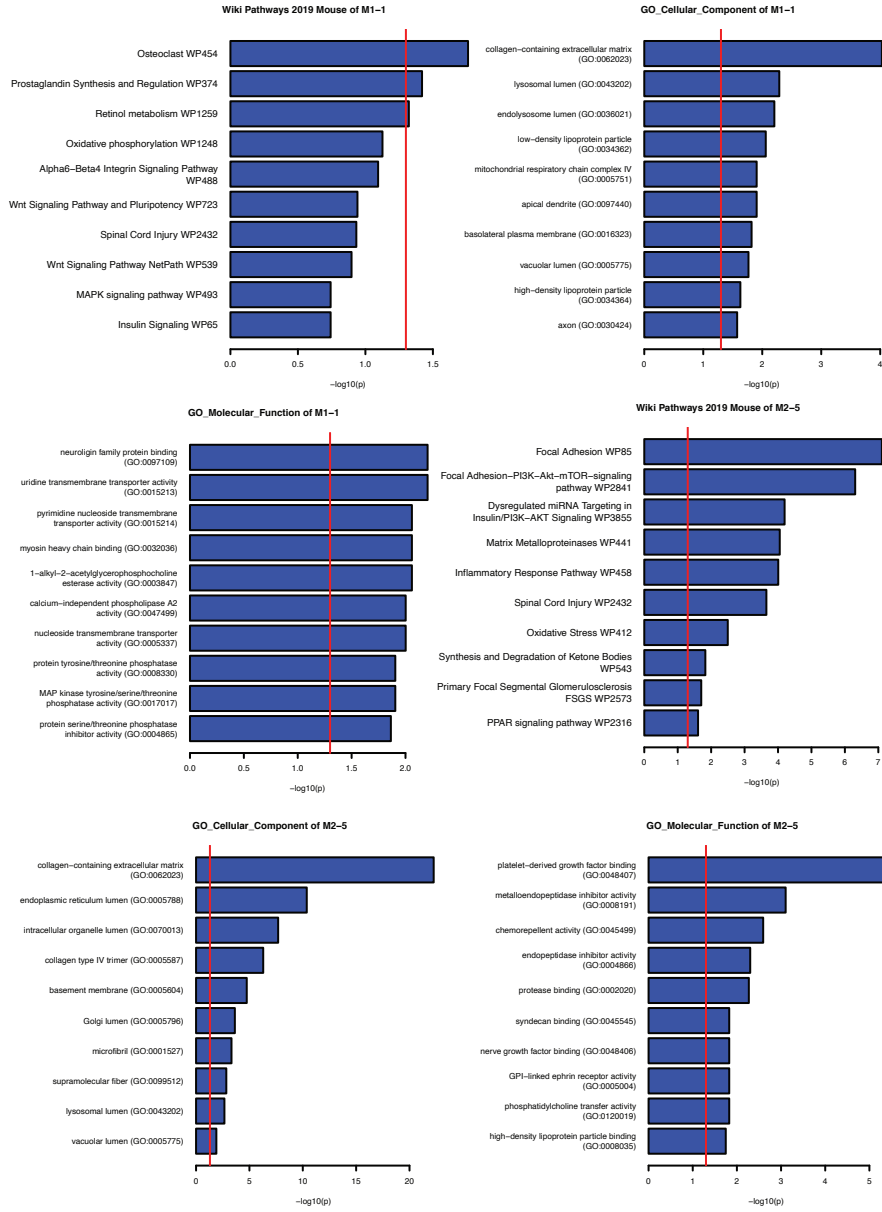

**Figure S5: Pathway analyses of cell types enriched with nsCS genes in scRNAseq developing suture dataset.**

Wiki pathway, GO cellular component and molecular function analyses for top genes in nsCS-enriched M1-1 and M2-5 pial fibroblast clusters. Dotted red line indicates threshold p-value of 0.05.

a

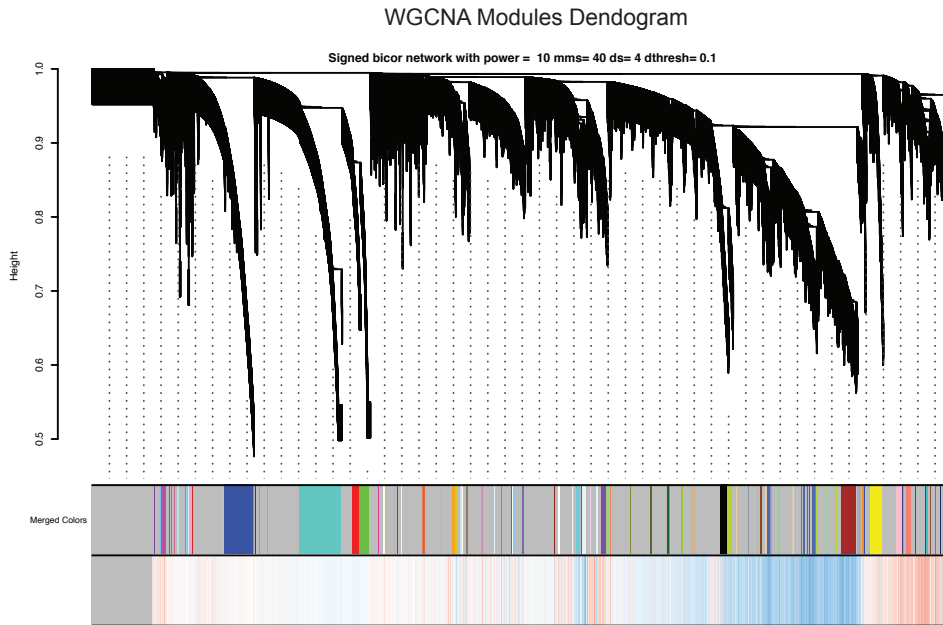

b

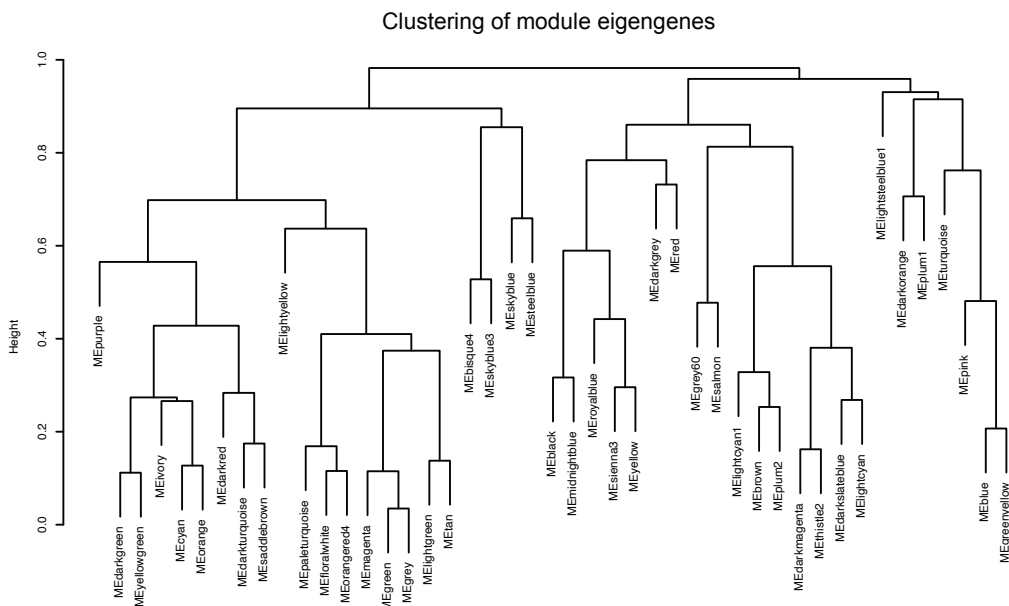

**Figure S6: Weighted gene co-expression network analysis (WGCNA) of developing human brain bulkRNA dataset.**

- a) Gene clustering dendrogram constructed via hierarchical clustering of adjacency-based dissimilarity. The colored row below the dendrogram indicates module membership identified by the dynamic tree cut method.

- b) Hierarchical clustering of module eigengenes summarizing the relationships between modules constructed during clustering analysis. Branches of the dendrogram demonstrate eigengenes that are positively correlated and therefore grouped together.



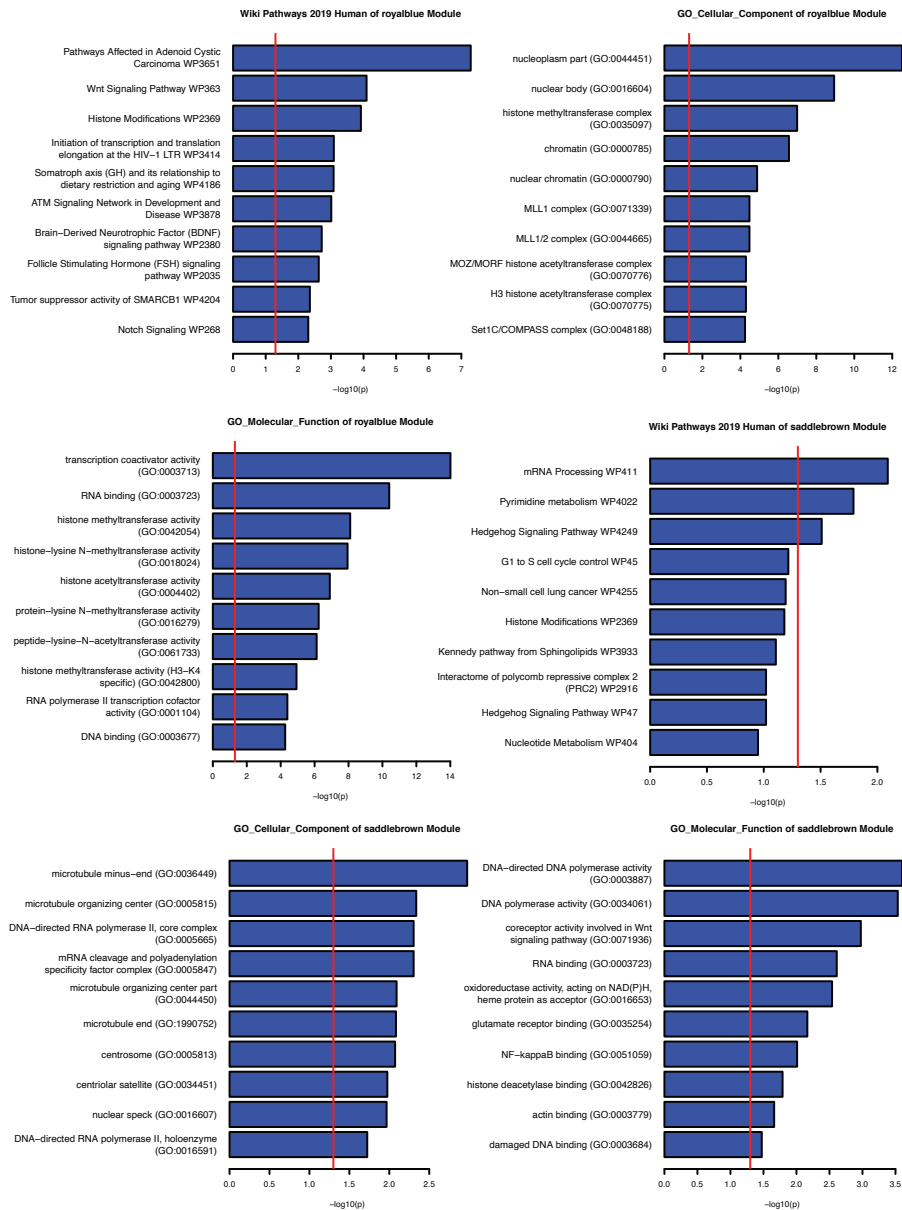

**Figure S8: Pathway analyses of WGCNA modules enriched with nsCS genes in developing human brain bulkRNA dataset.**

Wiki pathway, GO cellular component and molecular function analyses for top genes in nsCS-enriched royalblue and saddlebrown modules. Dotted red line indicates threshold p-value of 0.05.

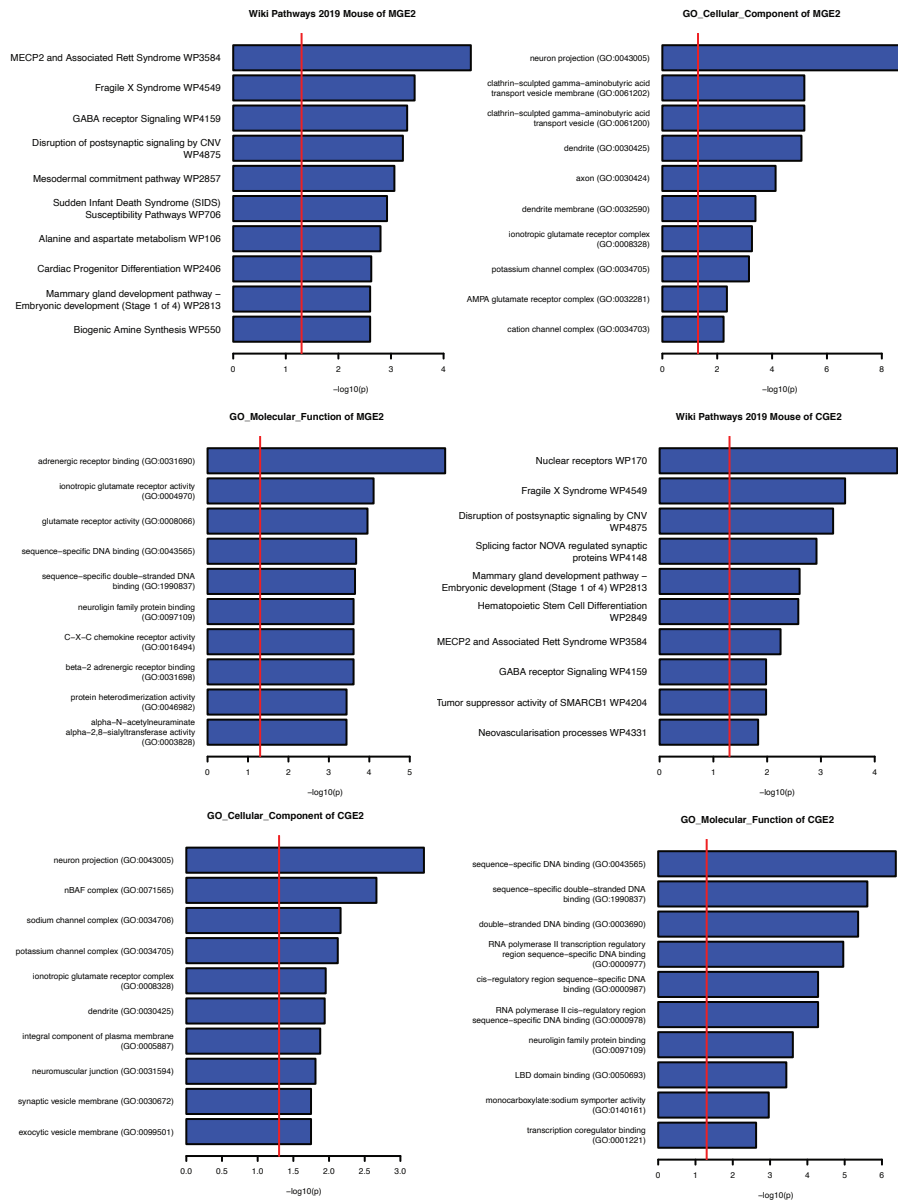

**Figure S9: Pathway analyses of cell types enriched with nsCS genes in scRNAseq developing human brain dataset.**

Wiki pathway, GO cellular component and molecular function analyses for top genes in nsCS-enriched IN-CTX-MGE2 and IN-CTX-CGE2 clusters. Dotted red line indicates threshold p-value of 0.05.

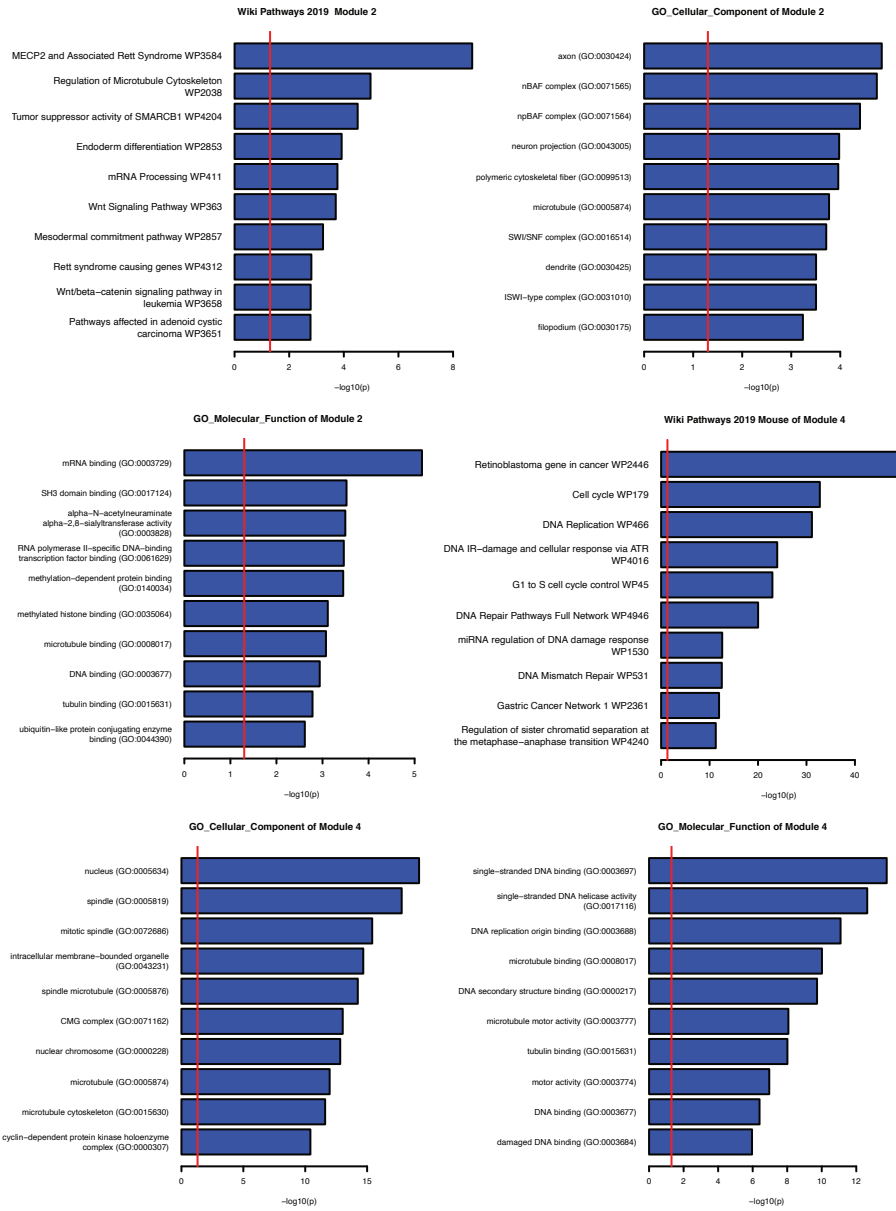

**Figure S10: Pathway analyses of modules enriched with nsCS genes in scRNAseq developing human brain dataset.**

Wiki pathway, GO cellular component and molecular function analyses for top genes in nsCS-enriched modules 2 and 4. Dotted red line indicates threshold p-value of 0.05.
